# Supplementary material for: Biological Systems of Vitamin K: A Plasma Nutriproteomics Study of Subclinical Vitamin K Deficiency in 500 Nepalese Children
Source: PubMed Central journal article supplement (PMC4840917; doi:10.1089/omi.2015.0178), 2016-04-01
Supplement: Supp_Table2.pdf [file Supp_Table2.pdf]

## Supplementary Data

SUPPLEMENTARY TABLE S2. PLASMA PROTEINS ASSOCIATED WITH PLASMA PIVKA-II  
IN NEPALESE CHILDREN 6–8 YEARS OF AGE ( $q < 0.20$ )

| <i>Protein name</i>                                            | <i>Gene symbol</i> | <i>n</i> <sup>a</sup> | <i>Percent Change</i> <sup>b</sup> | <i>P</i> <sup>c</sup> | <i>q</i> <sup>d</sup> | <i>R</i> <sup>2,e</sup> | <i>Accession</i> |
|----------------------------------------------------------------|--------------------|-----------------------|------------------------------------|-----------------------|-----------------------|-------------------------|------------------|
| Prothrombin or coagulation factor II                           | F2                 | 474                   | 137.5 (50.1, 275.8)                | 0.0002                | 0.0556                | 0.29                    | 4503635          |
| Cadherin 5, type 2 (vascular endothelium)                      | CDH5               | 474                   | -39.8 (-54.6, -20.1)               | 0.0004                | 0.0649                | 0.29                    | 166362713        |
| Calcium channel, voltage-dependent,<br>alpha 2/delta subunit 1 | CACNA2D1           | 200                   | -46.0 (-61.7, -23.8)               | 0.0005                | 0.0649                | 0.30                    | 54112390         |
| Gelsolin                                                       | GSN                | 467                   | -38.6 (-53.8, -18.6)               | 0.0007                | 0.0895                | 0.30                    | 4504165          |
| Hemoglobin, delta                                              | HBD                | 211                   | 11.7 (4.7, 19.1)                   | 0.0008                | 0.0921                | 0.27                    | 4504351          |
| Tubulin, alpha 4a                                              | TUBA4A             | 245                   | 40.9 (14.9, 72.6)                  | 0.0010                | 0.1033                | 0.30                    | 17921989         |
| Carbonic anhydrase II                                          | CA2                | 419                   | 18.6 (6.9, 31.6)                   | 0.0012                | 0.1155                | 0.27                    | 4557395          |
| Multimerin 2                                                   | MMRN2              | 420                   | -33.7 (-48.4, -14.8)               | 0.0013                | 0.1155                | 0.27                    | 221316695        |
| Alpha-1-B glycoprotein                                         | A1BG               | 474                   | 101.1 (31.0, 208.6)                | 0.0014                | 0.1162                | 0.29                    | 21071030         |
| Sex hormone-binding globulin                                   | SHBG               | 460                   | -24.6 (-37.0, -9.8)                | 0.0021                | 0.1533                | 0.29                    | 7382460          |
| Hemoglobin, alpha 1                                            | HBA1               | 460                   | 9.6 (3.4, 16.3)                    | 0.0022                | 0.1533                | 0.27                    | 4504347          |
| Anthrax toxin receptor 2                                       | ANTXR2             | 352                   | -30.3 (-44.8, -12.2)               | 0.0022                | 0.1533                | 0.26                    | 50513243         |
| Catalase                                                       | CAT                | 454                   | 20.6 (6.8, 36.2)                   | 0.0025                | 0.1587                | 0.27                    | 4557014          |
| Endoplasmic reticulum protein 44                               | ERP44              | 95                    | 80.3 (22.2, 166.1)                 | 0.0030                | 0.1728                | 0.22                    | 52487191         |
| Peroxiredoxin 2                                                | PRDX2              | 460                   | 14.8 (4.8, 25.8)                   | 0.0031                | 0.1728                | 0.28                    | 32189392         |
| S100 calcium binding protein A4                                | S100A4             | 96                    | 48.7 (14.2, 93.5)                  | 0.0032                | 0.1728                | 0.30                    | 4506765          |
| Histidine triad nucleotide binding protein 1                   | HINT1              | 55                    | 49.2 (14.3, 94.8)                  | 0.0033                | 0.1728                | 0.39                    | 4885413          |
| Phospholipid transfer protein                                  | PLTP               | 448                   | -35.3 (-51.8, -13.2)               | 0.0037                | 0.1802                | 0.29                    | 5453914          |
| Phosphofructokinase, liver                                     | PFKL               | 374                   | 41.4 (11.8, 78.9)                  | 0.0038                | 0.1802                | 0.27                    | 48762920         |
| Cat eye syndrome chromosome region,<br>candidate 1             | CECR1              | 174                   | 67.0 (17.8, 136.8)                 | 0.0040                | 0.1831                | 0.33                    | 29029552         |

PIVKA-II, protein induced vitamin K absence-II.

<sup>a</sup>Maximum number of observation was 474 ( $n=26$  zero values were dropped due to log2 transformation of plasma PIVKA-II).

<sup>b</sup>Percent change in PIVKA-II concentration with doubling (100% increase) of relative abundance of protein.

<sup>c</sup> $P$  value for hypothesis testing of a null association between PIVKA-II concentration and relative abundance of protein using a linear mixed model.

<sup>d</sup>Multiple hypothesis testing was corrected using false discovery rate.

<sup>e</sup>Variance in PIVKA-II concentration explained by protein.
