# Supplementary material for: Biological Systems of Vitamin K: A Plasma Nutriproteomics Study of Subclinical Vitamin K Deficiency in 500 Nepalese Children
Source: PubMed Central journal article supplement (PMC4840917; doi:10.1089/omi.2015.0178), 2016-04-01
Supplement: Supp_Table3.pdf [file Supp_Table3.pdf]

SUPPLEMENTARY TABLE S3. DIFFERENTIALLY ABUNDANT PLASMA PROTEINS BETWEEN CHILDREN WITH VITAMIN K DEFICIENCY AND CHILDREN WITH VITAMIN K SUFFICIENCY ( $q < 0.20$ )<sup>a</sup>

| <i>Protein name</i>                                     | <i>Gene symbol</i> | <i>n</i> <sup>b</sup> | <i>Percent difference</i> <sup>c</sup> | <i>P</i> <sup>d</sup> | <i>q</i> <sup>e</sup> | <i>Accession</i> |
|---------------------------------------------------------|--------------------|-----------------------|----------------------------------------|-----------------------|-----------------------|------------------|
| Endoplasmic reticulum resident protein 44               | ERP44              | 97                    | 28.0 (14.2, 43.5)                      | $2.16 \times 10^{-5}$ | 0.0228                | 52487191         |
| Cadherin 5, type 2                                      | CDH5               | 500                   | -6.2 (-9.0, -3.4)                      | $2.86 \times 10^{-5}$ | 0.0228                | 166362713        |
| Prothrombin                                             | F2                 | 500                   | 3.6 (1.7, 5.5)                         | 0.0002                | 0.0612                | 4503635          |
| Inhibin beta E chain                                    | INHBE              | 97                    | 30.4 (13.4, 50.0)                      | 0.0002                | 0.0612                | 13899338         |
| Zinc finger protein 645                                 | ZNF645             | 388                   | 10.4 (4.7, 16.4)                       | 0.0003                | 0.0671                | 22749189         |
| Heparin cofactor II                                     | SERPIND1           | 500                   | 5.6 (2.5, 8.8)                         | 0.0003                | 0.0671                | 73858566         |
| Alpha 1B-glycoprotein                                   | A1BG               | 500                   | 3.6 (1.6, 5.6)                         | 0.0004                | 0.0758                | 21071030         |
| Haptoglobin isoform 1                                   | HP                 | 354                   | 41.4 (15.2, 73.5)                      | 0.0009                | 0.1443                | 4826762          |
| Lymphatic vessel endothelial hyaluronic acid receptor 1 | LYVE1              | 479                   | -6.8 (-10.8, -2.7)                     | 0.0013                | 0.1659                | 40549451         |
| Multimerin-2                                            | MMRN2              | 444                   | -6.1 (-9.6, -2.4)                      | 0.0014                | 0.1659                | 221316695        |
| Vasorin                                                 | VASN               | 500                   | -4.7 (-7.5, -1.9)                      | 0.0014                | 0.1659                | 88702793         |
| Filamin-C isoform b                                     | FLNC               | 175                   | 56.3 (18.0, 107.2)                     | 0.0019                | 0.1988                | 188595687        |

PIVKA-II, protein induced vitamin K absence-II.

<sup>a</sup>Vitamin K deficiency and sufficiency were defined as PIVKA-II concentration  $>$  and  $\leq 2$  ng/mL, respectively.

<sup>b</sup>Maximum number of observation was 500.

<sup>c</sup>Percent difference in relative abundance of protein between children with vitamin K deficiency and sufficiency.

<sup>d</sup>*P* value for hypothesis testing of no difference in relative protein abundance between two groups.

<sup>e</sup>Multiple hypothesis testing was corrected using false discovery rate.
